# Supplementary material for: Key Factors Impacting Morning Report Learning in Emergency Residency Training: A Multicenter Qualitative Study
Source: Research Square preprint supplement (doi:10.21203/rs.3.rs-6882139/v1), 2025-07-10
Supplement: Supplementary file 1 [file 836aca7c5da30b2689425f0b.pdf]

**Factors that influence Morning Report Learning Experience in Emergency Residency**

**Training: Multicenter, Qualitative Study**

## **The semi-structure template**

|                                        |          |
|----------------------------------------|----------|
| <b>Research objectives</b>             | <b>2</b> |
| <b>What will we do in this session</b> | <b>2</b> |
| General questions                      | 3        |
| The presenter                          | 3        |
| Mentor                                 | 3        |
| Attendees                              | 3        |
| Teaching methods                       | 4        |
| Time                                   | 4        |
| Venue                                  | 4        |

- **Thank you** for participating in this search project
- **My name** is "NAME". I am one of the research members for the project "Project Name".
- Other team members are: Dr. Ali Alkhulaif, and Dr. Mona aljohani

### Research objectives

- The research **objectives** is → understand the factors that facilitate, or hinder the learning experience in emergency medicine morning report sessions
- We hope this project will have **positive impact** on the way we run morning reports in the ED

### What will we do in this session

- Take your **input** about the educational impact of the morning report on your emergency medicine residency program training
- There will be a **recording** but all the data and names will be confidential and will be used for research purpose only
- We do the recording since it is a **qualitative study**. There will be no resident names, but rather random numbers of the participants
- We will share with you the results with the goal is to **improve the educational benefits** of the morning reports for all SBEM centers
- The duration of the study will be between **30-60 minutes**
- I will verbalize some questions related to **various aspects** of morning report
- Please feel free to **share your thoughts**, positive or negative inputs about your experience of morning report either at your center or any other center

### General questions

- How is your **experience** with the morning report so far? Was it **beneficial or not**?
- What **aspects** do you think **enhance** your **positive** learning experience in the morning report?
- What **aspects** do you think **hinder** your positive learning experience in the morning report?

### The presenter

- What are the aspects of the presenter that would enhance or hinder the learning experience in the morning report?
- Examples
  - **Level** of the **experience** → junior resident, senior resident, consultant
  - **Passion** about the topic
  - **Speciality** → EM vs non-EM
  - Morning resident, that

### Mentor

- What are the aspects of the mentor that would enhance or hinder the learning experience in the morning report?
- Examples
  - **Presence of a consultant** in the morning report
  - **Delegate the mentorship** to a senior resident
  - Presence of **more than one mentor**
  - **Being involved** "during the steps of the case" or take-home messages at the end of the morning report

### Attendees

- How would the attendees affect your learning experience?
- Examples:
  - **No. of attendees**
  - Mandatory for the **night shift**
  - Residents only vs all trainees including **medical students**
  - **Staff physicians**

### Topics

- What are the factors in terms of the topics being covered in the morning report that would enhance or hinder the learning experience in the morning report?
- Examples
  - **Case-based scenario**
  - **Common cases vs rare cases**
  - **Predetermined vs unknown topics**
  - **Exam-based topics** vs practice-based topics
  - Objectives: shared with the trainees vs unknown

### Teaching methods

- What are the factors in terms of the teaching method being used in the morning report that would enhance or hinder the learning experience in the morning report?
- Examples
  - White-board
  - Case-based scenario
  - Slides show
  - Lecture
  - Hands-on session
  - Simulation scenario
  - Playing video on the slides
  -

### Time

- What are the factors in terms of the starting time, duration, frequency that would enhance or hinder the learning experience in the morning report?
- Examples
  - Starting time → (at 07:00 am, at 05:00 am)
  - Between which shifts (night/morning , morning/afternoon/night)
  - Days → all working days, vs all days including Friday/Saturday
  - All blocks, vs stop after the major exams
  - During the summer vacation, Month of Ramadan, Hajj season

### Venue

- Any aspect related to the venue would enhance or hinder the learning experience in the morning report?
- Examples:
  - Small room, large room, round-table
  - Audiovisual set-up
